# Supplementary material for: Highly efficient deep-red organic light-emitting diodes using exciplex-forming co-hosts and thermally activated delayed fluorescence sensitizers with extended lifetime
Source: Royal Society of Chemistry journal article supplement (doi:10.1039/c9tc02834j), 2019-01-01
Supplement: c9tc02834j1.pdf [file c9tc02834j1.pdf]

## Supporting Information

### Highly efficient deep-red organic light-emitting diodes using exciplex-forming co-hosts and thermally activated delayed fluorescent sensitizers with extended lifetime

Dan Li<sup>1</sup> and Liang-Sheng Liao<sup>1, 2, \*</sup>

<sup>1</sup> Institute of Functional Nano & Soft Materials (FUNSOM), Jiangsu Key Laboratory for Carbon-Based Functional Materials & Devices, Soochow University, Suzhou, 215123, Jiangsu, China.

<sup>2</sup> Institute of Organic Optoelectronics, JITRI, Wujiang, Suzhou, Jiangsu 215211, China.

Email: [lslliao@suda.edu.cn](mailto:lslliao@suda.edu.cn)

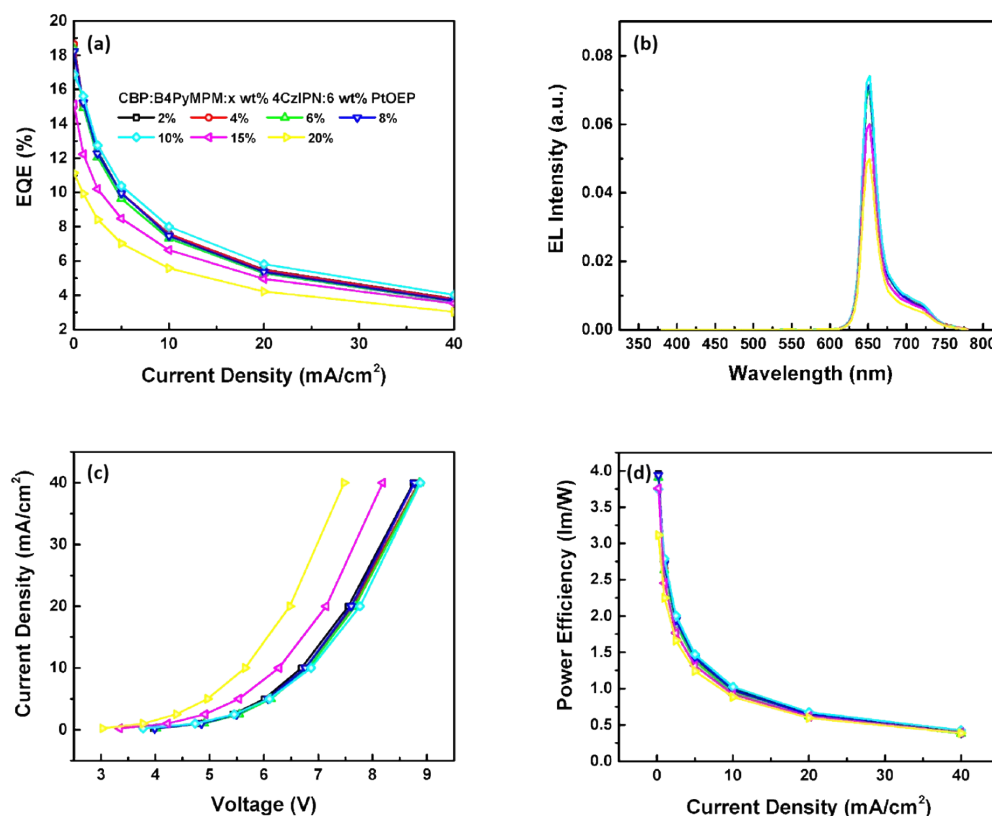

Figure S1 (a) External quantum efficiencies (EQEs) vs. current densities, (b) electroluminescence (EL) spectra, (c) current densities vs. voltage, and (d) power efficiencies (PEs) vs. current densities curves of the novel-design PtOEP-based deep-red PhOLEDs with various 4CzIPN concentrations from 2 wt% to 20 wt% at the doping concentration 6 wt% of the guest PtOEP.

(ITO/HAT-CN (10 nm)/TAPC (55 nm)/TCTA (10 nm)/ CBP:B4PyMPM: x wt% 4CzIPN: 6 wt% PtOEP (30 nm)/B4PyMPM (55 nm)/ Liq (2 nm)/Al (110 nm))

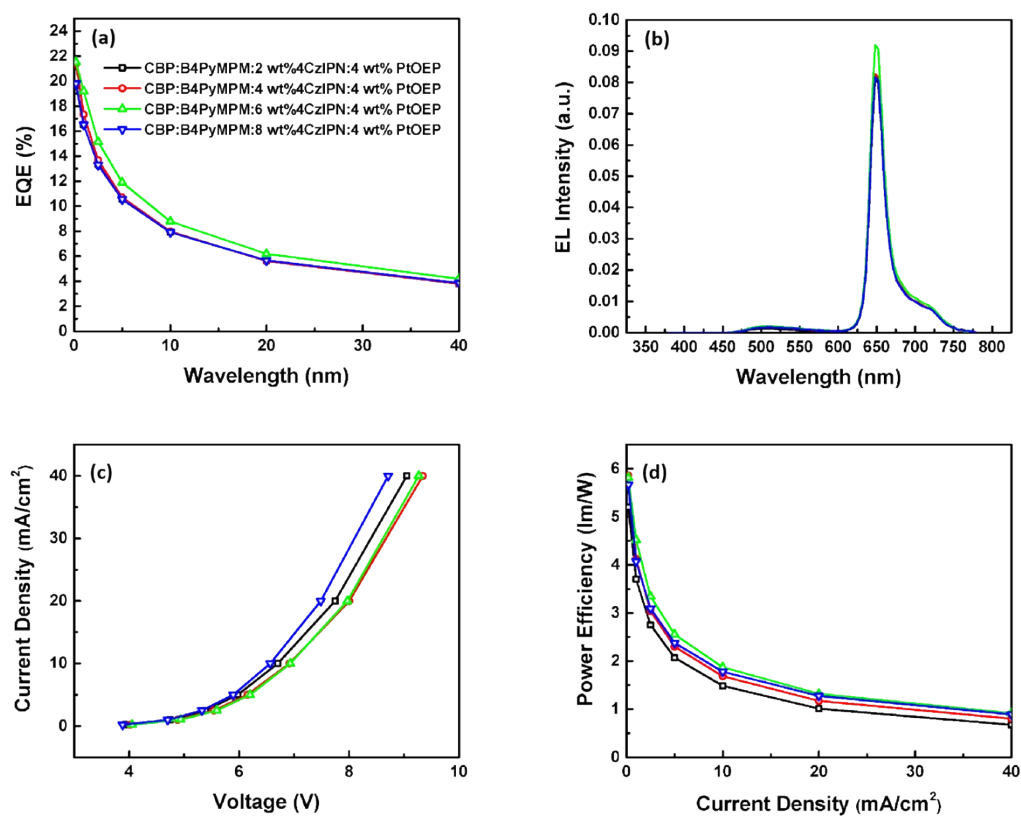

Figure S2 (a) External quantum efficiencies (EQEs) vs. current densities, (b) electroluminescence (EL) spectra, (c) current densities vs. voltage, and (d) power efficiencies (PEs) vs. current densities curves of novel-design PtOEP-based deep-red PhOLEDs with various 4CzIPN concentrations from 2 wt% to 8 wt% at the doping concentration 4 wt% of the guest PtOEP.

(ITO/HAT-CN (10 nm)/TAPC (55 nm)/TCTA (10 nm)/ CBP:B4PyMPM: x wt% 4CzIPN: 4 wt% PtOEP (30 nm)/B4PyMPM (55 nm)/ Liq (2 nm)/Al (110 nm))

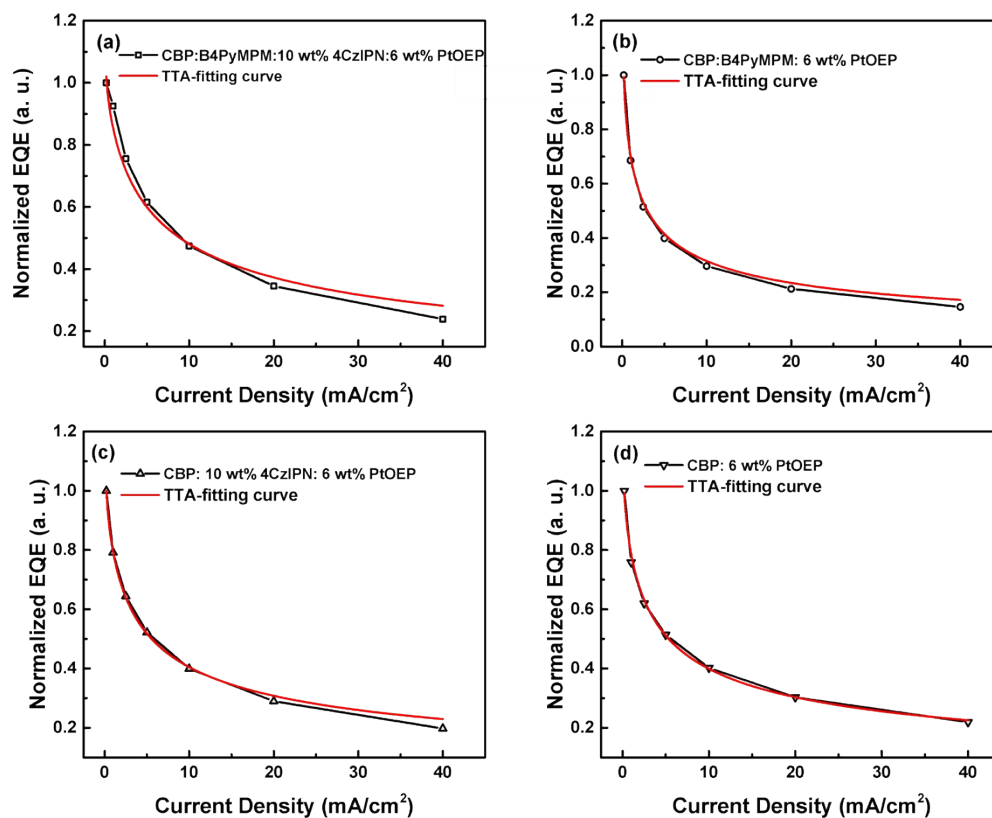

Figure S3 Images of TTA-fitting stimulation for PtOEP-based deep-red PhOLEDs using different emitting layers of (a) CBP:B4PyMPM: 10 wt% 4CzIPN: 6 wt% PtOEP, (b) CBP:B4PyMPM: 6 wt% PtOEP, (c) CBP:10 wt% 4CzIPN: 6 wt% PtOEP and (d) CBP:6 wt% PtOEP.

Table S1. The photoluminescence quantum yields (PLQYs) of emitting layers.

| Emitting layer                           | Photoluminescence quantum yield (PLQY) |
|------------------------------------------|----------------------------------------|
| CBP: B4PyMPM: 6 wt% 4CzIPN: 4 wt% PtOEP  | 50                                     |
| CBP: B4PyMPM: 10 wt% 4CzIPN: 6 wt% PtOEP | 43                                     |
| CBP: B4PyMPM: 6 wt% PtOEP                | 40                                     |
| CBP: 10 wt% 4CzIPN: 6 wt% PtOEP          | 36                                     |
| CBP: 6 wt% PtOEP                         | 35                                     |

(The PLQYs were tested by HORIBA, Fluorolog-3.)
